# Supplementary figures and images for: Multifocal visual evoked potentials in chronic inflammatory demyelinating polyneuropathy
Source: PubMed Central journal article supplement — Ann Clin Transl Neurol. 2018 Jul 7;5(8):952–61. doi: 10.1002/acn3.593 (PMC6093840; doi:10.1002/acn3.593), 2018-07-07

A

left

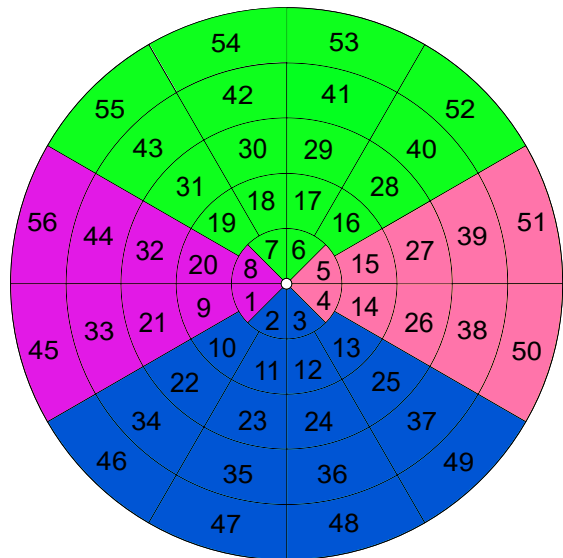

right

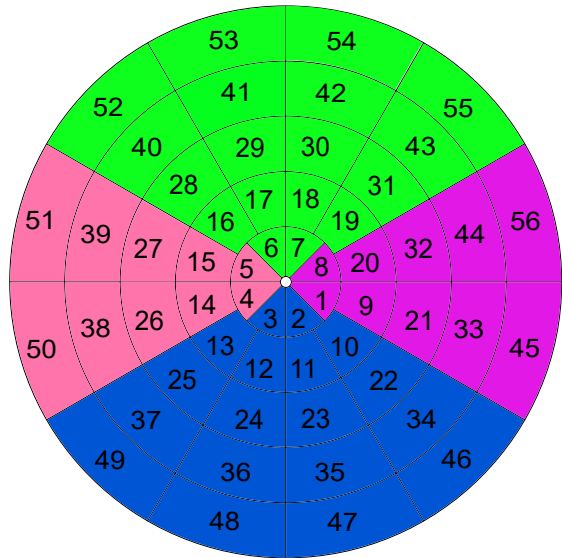

B

left

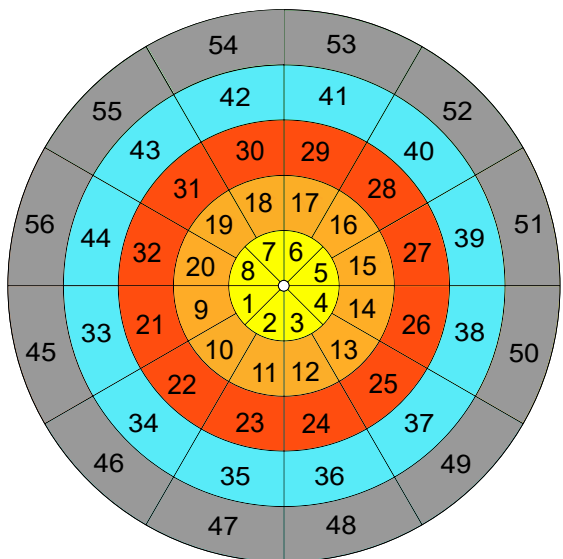

right

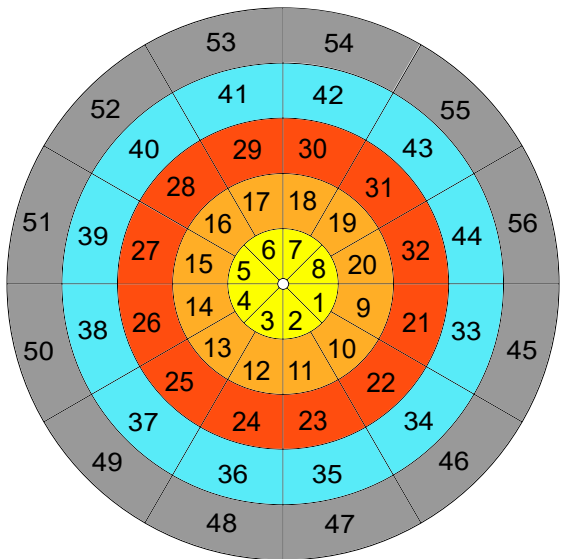

Supplement: ACN3-5-952-s001.pdf [file ACN3-5-952-s001.pdf]

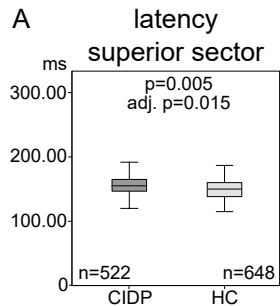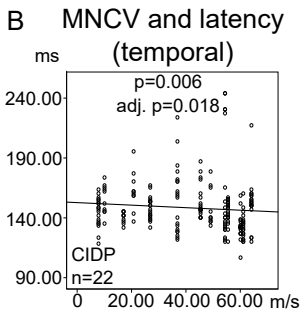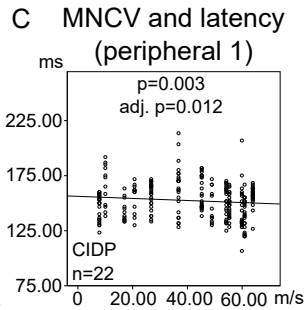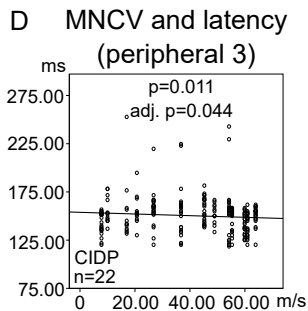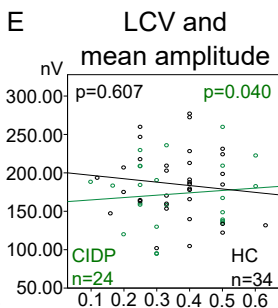

Supplement: ACN3-5-952-s002.pdf [file ACN3-5-952-s002.pdf]
